# Supplementary material for: The developmental process of suicidal ideation among adolescents: social and psychological impact from a nation-wide survey
Source: PubMed Central journal article supplement (PMC10684516; doi:10.1038/s41598-023-48201-6), 2023-11-28
Supplement: 41598_2023_48201_MOESM1_ESM.pdf [file 41598_2023_48201_MOESM1_ESM.pdf]

## Appendix 1

Bivariate relationships between the frequency of suicidal ideation and the variables of the following groups: relational status, social interaction, and individual well-being.

Table 1. Frequency of suicidal ideation by relational status group's variables (n)

|                                                 |                          | <b>More than once</b> | <b>Once</b> | <b>Never</b> |
|-------------------------------------------------|--------------------------|-----------------------|-------------|--------------|
| <b>Quality of friendship</b>                    | Low                      | 32.3% (46)            | 23.9% (34)  | 43.6% (62)   |
|                                                 | Medium                   | 23.5% (309)           | 24.5% (322) | 51.9% (582)  |
|                                                 | High                     | 18.5% (475)           | 22.7% (582) | 58.7% (1503) |
| <b>Quality of father-child relationships</b>    | Low                      | 35.7% (315)           | 26.0% (229) | 38.1% (336)  |
|                                                 | Medium                   | 20.1% (413)           | 24.3% (500) | 55.5% (1140) |
|                                                 | High                     | 13.9% (173)           | 18.6% (232) | 67.3% 837)   |
| <b>Quality of mother-child relationships</b>    | Low                      | 35.7% (270)           | 27.3% (207) | 36.9% (279)  |
|                                                 | Medium                   | 21.7% (464)           | 24.2% (517) | 54.0% (1155) |
|                                                 | High                     | 13.6% (189)           | 19.3% (267) | 66.9% (924)  |
| <b>Friendship satisfaction</b>                  | Not at all               | 51.5% (33)            | 14.0% (9)   | 34.3% (22)   |
|                                                 | Slightly                 | 38.2% (129)           | 28.7% (97)  | 32.9% (111)  |
|                                                 | Moderately               | 21.6% (432)           | 25.5% (510) | 52.8% (1055) |
|                                                 | Very much                | 17.7% (336)           | 20.0% (378) | 62.2% (1176) |
| <b>Frequency of getting together with peers</b> | Never                    | 31.1% (129)           | 21.2% (88)  | 47.6% (197)  |
|                                                 | Once a week              | 27.9% (349)           | 25.8% (322) | 46.3% (579)  |
|                                                 | Two or more times a week | 17.6% (353)           | 23.6% (472) | 58.7% (1175) |
|                                                 | Every day                | 15.9% (99)            | 17.9% (112) | 66.2% (413)  |
| <b>Friendship network size</b>                  | None                     | 36.4% (100)           | 20.4% (56)  | 43.0% (118)  |
|                                                 | From 1 to 3              | 23.0% (503)           | 24.7% (541) | 52.1% (1140) |
|                                                 | From 4 to 6              | 19.2% (256)           | 22.4% (229) | 58.2% (775)  |
|                                                 | 6>                       | 14.2% (71)            | 19.6% (98)  | 66.2% (331)  |
| <b>Relational status (latent factor)</b>        | Negative                 | 37.4% (107)           | 20.3% (58)  | 42.3% (121)  |
|                                                 | Positive                 | 20.6% (823)           | 23.4% (936) | 56% (2243)   |

Table 2. Frequencies of suicidal ideation by social interaction group's variables (n)

|                             |        | <b>More than once</b> | <b>Once</b> | <b>Never</b> |
|-----------------------------|--------|-----------------------|-------------|--------------|
| <b>Systemic trust</b>       | Low    | 30.2% (339)           | 23.5% (264) | 46.2% (519)  |
|                             | Medium | 20.4% (435)           | 25.1% (535) | 54.5% (1162) |
|                             | High   | 15.1% (156)           | 18.8% (195) | 66% (683)    |
| <b>Trust towards father</b> | Absent | 47.7% (124)           | 23.8% (62)  | 28.4% (74)   |
|                             | Low    | 40.3% (187)           | 28.% (130)  | 31.7% (147)  |
|                             | Medium | 27.9% (287)           | 26.7% (274) | 45.4% (466)  |

|                                                       |         |              |             |              |
|-------------------------------------------------------|---------|--------------|-------------|--------------|
|                                                       | High    | 12.5% (303)  | 20.4% (495) | 67.1% (1625) |
| <b>Trust towards mother</b>                           | Absent  | 55.3% (73)   | 20.4% (27)  | 24.2% (132)  |
|                                                       | Low     | 47.3% (152)  | 27.7% (89)  | 24.9% (321)  |
|                                                       | Medium  | 30.3% (279)  | 27.9% (257) | 41.7% (920)  |
|                                                       | High    | 14.5% (422)  | 21.3% (618) | 64.2% (2904) |
| <b>Trust towards friends</b>                          | Absent  | 35.6% (58)   | 23.9% (39)  | 40.5% (66)   |
|                                                       | Low     | 32.3% (229)  | 24.4% (173) | 43.3% (307)  |
|                                                       | Medium  | 18.8% (382)  | 24.6% (500) | 56.6% (1152) |
|                                                       | High    | 18.9% (261)  | 20.4% (282) | 60.7% (839)  |
| <b>Cyberbullying victimisation</b>                    | Absent  | 16.8% (583)  | 22.6% (786) | 60.5% (2098) |
|                                                       | Present | 42.2% (347)  | 25.3% (208) | 32.4 % (266) |
| <b>Bullying victimisation</b>                         | Absent  | 11.9% (205)  | 15.4% (265) | 72.7% (1255) |
|                                                       | Present | 28.3 % (725) | 28.4% (729) | 43.3% (1109) |
| <b>Hyperconnection</b>                                | Absent  | 18.7% (485)  | 23.1% (601) | 58.2% (1511) |
|                                                       | Present | 26.3% (445)  | 23.2% (393) | 50.4% (853)  |
| <b>School connectedness</b>                           | Absent  | 30% (506)    | 25.1% (424) | 44.9% (757)  |
|                                                       | Present | 16.3% (424)  | 21.9% (570) | 61.8% (1607) |
| <b>Tolerance towards alcohol and other substances</b> | High    | 33.1% (296)  | 24.1% (216) | 42.8% (383)  |
|                                                       | Medium  | 22.1% (415)  | 25.5% (481) | 52.4% (988)  |
|                                                       | Low     | 14.5% (219)  | 19.7% (297) | 65.8 % (993) |
| <b>Body satisfaction</b>                              | Present | 13.4% (322)  | 20.1% (481) | 66.4% (1593) |
|                                                       | Absent  | 32.1% (608)  | 27.1% (513) | 40.7% (771)  |
| <b>Academic performance</b>                           | High    | 18.1% (171)  | 23.1% (218) | 58.8% (556)  |
|                                                       | Medium  | 21.2% (619)  | 23.2% (680) | 55.5% (1625) |
|                                                       | Low     | 33.4% (140)  | 22.9% (96)  | 43.6% (183)  |
| <b>Interparental conflicts</b>                        | Present | 32.5% (420)  | 26.7% (346) | 40.7% (527)  |
|                                                       | Absent  | 16.5% (474)  | 21.3% (612) | 62.1% (1780) |

Table 3. Frequencies of suicidal ideation by Individual well-being group's variables (n)

|                                               |          | <b>More than once</b> | <b>Once</b> | <b>Never</b> |
|-----------------------------------------------|----------|-----------------------|-------------|--------------|
| <b>Self-esteem</b>                            | Low      | 43.4% (634)           | 29.1% (425) | 27.5% (402)  |
|                                               | Medium   | 12.6% (266)           | 22.9% (485) | 64.4% (1362) |
|                                               | High     | 4.2% (30)             | 11.8% (84)  | 84% (600)    |
| <b>Intensity of negative primary emotions</b> | Low      | 8.9% (112)            | 14.7% (185) | 76.4% (964)  |
|                                               | Medium   | 19.4% (338)           | 26.3% (458) | 54.3% (946)  |
|                                               | High     | 37.3% (480)           | 27.3% (351) | 35.3% (454)  |
| <b>Attitude towards future</b>                | Positive | 14.3% (423)           | 22 % (650)  | 63.7% (1879) |
|                                               | Negative | 38.3% (505)           | 25.8% (341) | 35.9% (475)  |

|                                                  |        |             |             |              |
|--------------------------------------------------|--------|-------------|-------------|--------------|
| <b>Distress</b>                                  | Absent | 4.6% (63)   | 12.6% (172) | 82.8% (1133) |
|                                                  | Low    | 10.6% (98)  | 25.8% (238) | 63.5% (585)  |
|                                                  | Medium | 20.7% (152) | 31.6% (232) | 47.7% (351)  |
|                                                  | High   | 48.8% (617) | 27.8% (352) | 23.3% (295)  |
| <b>Happiness</b>                                 | Low    | 43.1% (592) | 24.8% (341) | 32.1% (441)  |
|                                                  | Medium | 14.6% (203) | 29% (403)   | 56.4% (782)  |
|                                                  | High   | 8.8% (135)  | 16.4% (250) | 74.8% (1141) |
| <b>Satisfaction</b>                              | Low    | 41.2% (493) | 26.1% (313) | 32.7% (391)  |
|                                                  | Medium | 17.8% (283) | 26% (412)   | 56.2% (895)  |
|                                                  | High   | 10.2% (154) | 17.9% (269) | 71.8% (1078) |
| <b>Individual well-being<br/>(latent factor)</b> | Low    | 50.2% (529) | 28.4% (299) | 21.4% (225)  |
|                                                  | Medium | 16.3% (360) | 25.9% (573) | 57.8% (1277) |
|                                                  | High   | 4% (41)     | 11.9% (122) | 84.1% (862)  |
