# Supplementary material for: The developmental process of suicidal ideation among adolescents: social and psychological impact from a nation-wide survey
Source: PubMed Central journal article supplement (PMC10684516; doi:10.1038/s41598-023-48201-6), 2023-11-28
Supplement: 41598_2023_48201_MOESM2_ESM.pdf [file 41598_2023_48201_MOESM2_ESM.pdf]

## Appendix 2

Table 1.1 Odds Ratio of the multinomial logistic regression models with Suicidal ideation as dependent variable and Socio-demographic characteristics as independent variables (95% Wald Confidence Limits)

| <b>Independent variable*</b>           | <b>Dependent variable</b>          | <b>Total OR</b>        | <b>Male OR</b>         | <b>Female OR</b>       |
|----------------------------------------|------------------------------------|------------------------|------------------------|------------------------|
| Type of school (Lyceum)                | Suicidal ideation (Once)           | /                      | 1.388<br>(1.05-1.833)  | /                      |
| Type of school (Technical)             | Suicidal ideation (More than once) | 0.747<br>(0.608-0.917) | /                      | /                      |
| Cohabiting parents (Yes)               | Suicidal ideation (More than once) | 0.793<br>(0.657-0.957) | /                      | /                      |
| Religious beliefs (absent)             | Suicidal ideation (More than once) | 1.978<br>(1.666-2.348) | 2.262<br>(1.761-2.905) | 2.308<br>(1.802-2.958) |
| Religious beliefs (absent)             | Suicidal ideation (Once)           | 1.265<br>(1.076-1.488) | 1.294<br>(1.045-1.603) | 1.513<br>(1.174-1.949) |
| Parental economic status (High)        | Suicidal ideation (More than once) | 0.47<br>(0.333-0.664)  | 0.514<br>(0.315-0.84)  | /                      |
| Parental economic status (High)        | Suicidal ideation (Once)           | 0.643<br>(0.463-0.893) | 0.628<br>(0.404-0.977) | /                      |
| Parental economic status (Medium-high) | Suicidal ideation (More than once) | 0.482<br>(0.363-0.893) | 0.423<br>(0.282-0.636) | /                      |
| Parental economic status (Medium-high) | Suicidal ideation (Once)           | 0.562<br>(0.425-0.743) | 0.531<br>(0.365-0.771) | /                      |
| Parental economic status (Medium-low)  | Suicidal ideation (More than once) | 0.64<br>(0.48-0.853)   | 0.577<br>(0.392-0.849) | /                      |
| Parental economic status (Medium-low)  | Suicidal ideation (Once)           | 0.631<br>(0.474-0.84)  | /                      | /                      |
| Citizenship (Italian)                  | Suicidal ideation (More than once) | 0.542<br>(0.404-0.726) | 0.513<br>(0.334-0.789) | /                      |
| Geographical area (North)              | Suicidal ideation (More than once) | 0.8<br>(0.668-0.957)   | /                      | 0.642<br>(0.496-0.831) |
| Geographical area (North)              | Suicidal ideation (Once)           | 0.779<br>(0.656-0.926) | /                      | /                      |

\*Reference value: Cohabiting parents (Not), Type of school (vocational), Religious beliefs (present), Parental economic status (low), Citizenship (foreign).

Table 1.2 Odds Ratio of the multinomial logistic regression models with Suicidal ideation as dependent variable and Socio-demographic characteristics and Individual well-being as independent variables (95% Wald Confidence Limits)

| <b>Independent variable*</b>     | <b>Dependent variable</b>          | <b>Total OR</b>        | <b>Male OR</b>          | <b>Female OR</b>        |
|----------------------------------|------------------------------------|------------------------|-------------------------|-------------------------|
| Religious beliefs (absent)       | Suicidal ideation (More than once) | 1.444<br>(1.193-1.748) | 1.659<br>(1.257-2.189)  | 1.626<br>(1.227-2.154)  |
| Type of school (Technical)       | Suicidal ideation (More than once) | 0.61<br>(0.485-0.766)  | /                       | /                       |
| Type of school (Technical)       | Suicidal ideation (Once)           | 0.808<br>(0.659-0.99)  | /                       | /                       |
| Citizenship (Italian)            | Suicidal ideation (More than once) | 0.544<br>(0.392-0.755) | 0.549<br>(0.339-0.889)  | /                       |
| Individual well-being (negative) | Suicidal ideation (More than once) | 7.961<br>(6.515-9.727) | 9.399<br>(7.181-12.302) | 7.588<br>(5.442-10.581) |
| Individual well-being (negative) | Suicidal ideation (Once)           | 2.939<br>(2.398-3.601) | 3.363<br>(2.618-4.32)   | 2.583<br>(1.804-3.698)  |

|                                  |                                    |                       |                        |                        |
|----------------------------------|------------------------------------|-----------------------|------------------------|------------------------|
| Individual well-being (positive) | Suicidal ideation (More than once) | 0.17<br>(0.121-0.239) | 0.187<br>(0.108-0.322) | 0.147<br>(0.094-0.228) |
| Individual well-being (positive) | Suicidal ideation (Once)           | 0.311<br>(0.25-0.387) | 0.286<br>(0.207-0.395) | 0.309<br>(0.228-0.42)  |

\*Reference value: Religious beliefs (present), Citizenship (foreign), Individual well-being (Medium)

Table 2.1 Odds Ratio of the multinomial logistic regression models with Suicidal ideation as dependent variable and Relational status as independent variables (95% Wald Confidence Limits)

| Independent variable*        | Dependent variable                 | Total OR               | Male OR               | Female OR            |
|------------------------------|------------------------------------|------------------------|-----------------------|----------------------|
| Relational status (Positive) | Suicidal ideation (More than once) | 0.411<br>(0.312-0.543) | 0.432<br>(0.296-0.63) | 0.37<br>(0.24-0.572) |

\*Reference value: Relational status (negative)

Table 2.2 Odds Ratio of the multinomial logistic regression models with Suicidal ideation as dependent variable and Relational status and Individual well-being as independent variables (95% Wald Confidence Limits)

| Independent variable*            | Dependent variable                 | Total OR               | Male OR                | Female OR               |
|----------------------------------|------------------------------------|------------------------|------------------------|-------------------------|
| Individual well-being (positive) | Suicidal ideation (More than once) | 0.626<br>(0.454-0.863) | /                      | 0.492<br>(0.297-0.816)  |
| Individual well-being (negative) | Suicidal ideation (More than once) | 8.003<br>(6.564-9.759) | 9.954<br>(7.62-13.004) | 7.812<br>(5.608-10.881) |
| Individual well-being (negative) | Suicidal ideation (Once)           | 2.976<br>(2.431-3.644) | 3.406<br>(2.655-4.369) | 2.644<br>(1.849-3.781)  |
| Individual well-being (positive) | Suicidal ideation (More than once) | 0.171<br>(0.122-0.24)  | 0.185<br>(0.108-0.32)  | 0.141<br>(0.091-0.22)   |
| Individual well-being (positive) | Suicidal ideation (Once)           | 0.312<br>(0.251-0.388) | 0.286<br>(0.207-0.394) | 0.304<br>(0.224-0.412)  |

\*Reference value: Individual well-being (Medium)

Table 3.1. Odds Ratio of the multinomial logistic regression models with Suicidal ideation as dependent variable and Social interaction variables as independent variables (95% Wald Confidence Limits)

| Independent variable*       | Dependent variable                 | Total OR               | Male OR                | Female OR              |
|-----------------------------|------------------------------------|------------------------|------------------------|------------------------|
| Systemic trust (High)       | Suicidal ideation (More than once) | 0.653<br>(0.502-0.848) | /                      | 0.402<br>(0.269-0.601) |
| Systemic trust (High)       | Suicidal ideation (Once)           | 0.759<br>(0.598-0.963) | /                      | 0.506<br>(0.349-0.733) |
| Systemic trust (Medium)     | Suicidal ideation (More than once) | 0.789<br>(0.642-0.969) | /                      | 0.615<br>(0.446-0.846) |
| Systemic trust (Medium)     | Suicidal ideation (Once)           | /                      | /                      | 0.72<br>(0.528-0.983)  |
| Trust towards father (High) | Suicidal ideation (More than once) | 0.349<br>(0.235-0.517) | 0.264<br>(0.149-0.468) | /                      |
| Trust towards father (High) | Suicidal ideation (Once)           | 0.645<br>(0.43-0.968)  | /                      | /                      |
| Trust towards mother (High) | Suicidal ideation (More than once) | 0.433<br>(0.259-0.724) | /                      | 0.199<br>(0.095-0.418) |

|                                       |                                    |                        |                        |                        |
|---------------------------------------|------------------------------------|------------------------|------------------------|------------------------|
| Trust towards mother (Medium-high)    | Suicidal ideation (More than once) | /                      | /                      | 0.464<br>(0.217-0.994) |
| Bullying victimisation (Absent)       | Suicidal ideation (More than once) | 0.436<br>(0.357-0.533) | 0.516<br>(0.399-0.668) | 0.353<br>(0.255-0.487) |
| Bullying victimisation (Absent)       | Suicidal ideation (Once)           | 0.414<br>(0.348-0.493) | 0.393<br>(0.315-0.492) | 0.44<br>(0.333-0.582)  |
| Cyberbullying victimisation (Absent)  | Suicidal ideation (More than once) | 0.374<br>(0.303-0.463) | 0.37<br>(0.276-0.497)  | 0.367<br>(0.269-0.502) |
| Cyberbullying victimisation (Absent)  | Suicidal ideation (Once)           | 0.713<br>(0.574-0.884) | 0.687<br>(0.513-0.92)  | /                      |
| School connectedness (Yes)            | Suicidal ideation (More than once) | 0.604<br>(0.504-0.724) | 0.52<br>(0.408-0.662)  | 0.664<br>(0.505-0.874) |
| School connectedness (Yes)            | Suicidal ideation (Once)           | 0.802<br>(0.679-0.948) | 0.706<br>(0.571-0.874) | /                      |
| Body satisfaction (Yes)               | Suicidal ideation (More than once) | 0.427<br>(0.357-0.512) | 0.476<br>(0.372-0.608) | 0.428<br>(0.323-0.568) |
| Body satisfaction (Yes)               | Suicidal ideation (Once)           | 0.614<br>(0.522-0.723) | 0.597<br>(0.48-0.743)  | 0.666<br>(0.516-0.858) |
| Interparental conflicts (Medium high) | Suicidal ideation (More than once) | 0.706<br>(0.499-0.999) | /                      | 0.593<br>(0.367-0.957) |
| Interparental conflicts (Absent)      | Suicidal ideation (More than once) | 0.441<br>(0.298-0.653) | /                      | 0.263<br>(0.148-0.467) |
| Interparental conflicts (Absent)      | Suicidal ideation (Once)           | 0.462<br>(0.317-0.674) | /                      | 0.314<br>(0.181-0.542) |
| Interparental conflicts (Low)         | Suicidal ideation (More than once) | 0.544<br>(0.388-0.762) | /                      | 0.375<br>(0.237-0.594) |
| Interparental conflicts (Low)         | Suicidal ideation (Once)           | 0.636<br>(0.456-0.886) | /                      | 0.485<br>(0.308-0.764) |

\*Reference value: Systemic trust (low), Trust towards father (low), Trust towards mother (low), Bullying victimisation (present), Cyberbullying victimisation (present), School connectedness (No), Body satisfaction (No), Interparental conflicts (present).

Table 3.2 Odds Ratio of the multinomial logistic regression models with Suicidal ideation as dependent variable and Social interaction variables and Individual well-being as independent variables (95% Wald Confidence Limits)

| Independent variable*                | Dependent variable                 | Total OR               | Male OR                | Female OR              |
|--------------------------------------|------------------------------------|------------------------|------------------------|------------------------|
| Systemic trust (High)                | Suicidal ideation (More than once) | /                      | /                      | 0.483<br>(0.318-0.733) |
| Systemic trust (High)                | Suicidal ideation (Once)           | /                      | /                      | 0.557<br>(0.383-0.81)  |
| Systemic trust (Medium)              | Suicidal ideation (More than once) | /                      | /                      | 0.627<br>(0.448-0.877) |
| Systemic trust (Medium)              | Suicidal ideation (Once)           | /                      | /                      | 0.724<br>(0.528-0.992) |
| Trust towards father (High)          | Suicidal ideation (More than once) | 0.409<br>(0.271-0.618) | 0.321<br>(0.185-0.559) | /                      |
| Trust towards mother (High)          | Suicidal ideation (More than once) | /                      | /                      | 0.337<br>(0.157-0.725) |
| Bullying victimisation (Absent)      | Suicidal ideation (More than once) | 0.528<br>(0.428-0.651) | 0.644<br>(0.49-0.848)  | 0.419<br>(0.3-0.585)   |
| Bullying victimisation (Absent)      | Suicidal ideation (Once)           | 0.457<br>(0.383-0.545) | 0.44<br>(0.351-0.552)  | 0.471<br>(0.355-0.625) |
| Cyberbullying victimisation (Absent) | Suicidal ideation (More than once) | 0.43<br>(0.344-0.538)  | 0.468<br>(0.342-0.641) | 0.407<br>(0.294-0.565) |
| Cyberbullying victimisation (Absent) | Suicidal ideation (Once)           | 0.798<br>(0.64-0.995)  | /                      | /                      |
| Body satisfaction (Yes)              | Suicidal ideation (More than once) | 0.616<br>(0.508-0.746) | /                      | /                      |

|                                  |                                    |                        |                        |                        |
|----------------------------------|------------------------------------|------------------------|------------------------|------------------------|
| Body satisfaction (Yes)          | Suicidal ideation (Once)           | 0.75<br>(0.633-0.888)  | /                      | /                      |
| Interparental conflicts (Absent) | Suicidal ideation (More than once) | 0.489<br>(0.323-0.739) | /                      | 0.326<br>(0.178-0.597) |
| Interparental conflicts (Absent) | Suicidal ideation (Once)           | 0.497<br>(0.339-0.731) | /                      | 0.357<br>(0.204-0.624) |
| Interparental conflicts (Low)    | Suicidal ideation (More than once) | 0.564<br>(0.395-0.805) | /                      | 0.427<br>(0.263-0.694) |
| Interparental conflicts (Low)    | Suicidal ideation (Once)           | 0.648<br>(0.462-0.911) | /                      | 0.524<br>(0.33-0.834)  |
| Individual well-being (negative) | Suicidal ideation (More than once) | /                      | 7<br>(5.291-9.26)      | 5.187<br>(3.631-7.41)  |
| Individual well-being (negative) | Suicidal ideation (Once)           | 2.266<br>(1.833-2.801) | 2.735<br>(2.109-3.547) | 2.049<br>(1.413-2.97)  |
| Individual well-being (positive) | Suicidal ideation (More than once) | /                      | 0.24<br>(0.138-0.416)  | 0.236<br>(0.149-0.373) |
| Individual well-being (positive) | Suicidal ideation (Once)           | /                      | 0.343<br>(0.247-0.477) | 0.405<br>(0.295-0.557) |

\*Reference value: Systemic trust (low), Trust towards father (low), Trust towards mother (low), Bullying victimisation (present), Cyberbullying victimisation (present), School connectedness (No), Body satisfaction (No), Interparental conflicts (present), Individual well-being (Medium).
